# Supplementary material for: Nucleophilic degradation of diazinon in thermoreversible polymer–polymer aqueous biphasic systems
Source: Royal Society of Chemistry journal article supplement (doi:10.1039/d0cp06086k), 2021-01-01
Supplement: d0cp06086k1.pdf [file d0cp06086k1.pdf]

# Supporting Information

## **Nucleophilic degradation of Diazinon in thermoreversible polymer-polymer aqueous biphasic systems**

Daniela Millan,<sup>a#</sup> Mafalda R. Almeida,<sup>b#</sup> Ana F.C.S. Rufino,<sup>b</sup> João A.P. Coutinho,<sup>b</sup> Mara  
G. Freire<sup>b\*</sup>

<sup>a</sup>Centro Integrativo de Biología y Química Aplicada (CIBQA), Universidad Bernardo  
O'Higgins Santiago, Chile

<sup>b</sup>CICECO-Aveiro Institute of Materials, Department of Chemistry, University of Aveiro,  
3810-193 Aveiro, Portugal.

#Equally contributing authors

\*Corresponding author:

E-mail: maragfreire@ua.pt

Tel: +351 234401422

**Table S1.** Experimental data for the binodal weight fraction percentage of the ABS formed by PPG 400 (1) + PEG (2) + water (3) at  $(298 \pm 1)$  K and atmospheric pressure.

| PEG 600  |          |          | PEG 1000 |          |          |
|----------|----------|----------|----------|----------|----------|
| $100w_1$ | $100w_2$ | $100w_3$ | $100w_1$ | $100w_2$ | $100w_3$ |
| 71.74    | 7.39     | 20.87    | 68.07    | 6.81     | 25.12    |
| 65.93    | 9.27     | 24.80    | 63.83    | 7.82     | 28.35    |
| 61.76    | 9.92     | 28.32    | 61.23    | 8.84     | 29.93    |
| 59.30    | 10.76    | 29.95    | 57.86    | 9.55     | 32.59    |
| 57.14    | 11.58    | 31.28    | 55.78    | 10.39    | 33.83    |
| 54.13    | 13.23    | 32.64    | 50.76    | 11.53    | 37.71    |
| 52.00    | 13.77    | 34.23    | 49.11    | 12.23    | 38.65    |
| 50.39    | 14.35    | 35.25    | 45.08    | 13.22    | 41.71    |
| 48.83    | 14.86    | 36.31    | 43.73    | 13.77    | 42.50    |
| 47.37    | 15.43    | 37.20    | 41.37    | 14.61    | 44.02    |
| 45.23    | 16.60    | 38.17    | 40.05    | 15.15    | 44.80    |
| 41.50    | 17.79    | 40.70    | 39.03    | 15.58    | 45.39    |
| 39.78    | 18.87    | 41.36    | 37.51    | 16.54    | 45.95    |
| 38.67    | 19.29    | 42.04    | 36.53    | 16.90    | 46.57    |
| 37.35    | 19.93    | 42.72    | 34.09    | 17.93    | 47.98    |
| 36.36    | 20.26    | 43.39    | 30.92    | 19.35    | 49.73    |
| 34.97    | 20.99    | 44.03    | 29.05    | 20.71    | 50.24    |
| 33.88    | 21.66    | 44.47    | 26.93    | 22.21    | 50.86    |
| 32.43    | 22.59    | 44.98    | 24.93    | 23.65    | 51.43    |
| 31.40    | 23.14    | 45.46    | 68.07    | 6.81     | 25.12    |
| 30.03    | 23.82    | 46.15    |          |          |          |
| 29.09    | 24.36    | 46.55    |          |          |          |
| 26.88    | 26.18    | 46.93    |          |          |          |
| 25.19    | 27.59    | 47.22    |          |          |          |
| 22.99    | 29.79    | 47.22    |          |          |          |
| 20.91    | 32.11    | 46.99    |          |          |          |

**Table S2.** Experimental data for the binodal weight fraction percentage of the ABS formed by PPG 400 (1) + PEG (2) + water (3) at  $(298 \pm 1)$  K and atmospheric pressure.

| PEG 2000 |          |          | PEG 4000 |          |          | PEG 6000 |          |          |
|----------|----------|----------|----------|----------|----------|----------|----------|----------|
| $100w_1$ | $100w_2$ | $100w_3$ | $100w_1$ | $100w_2$ | $100w_3$ | $100w_1$ | $100w_2$ | $100w_3$ |
| 67.02    | 2.27     | 30.71    | 78.67    | 1.15     | 20.18    | 71.11    | 0.99     | 27.90    |
| 64.04    | 3.17     | 32.78    | 63.77    | 1.76     | 34.47    | 58.86    | 1.91     | 39.23    |
| 61.75    | 4.05     | 34.20    | 60.24    | 2.26     | 37.49    | 54.80    | 2.72     | 42.48    |
| 59.35    | 4.87     | 35.78    | 58.29    | 2.95     | 38.76    | 52.42    | 3.51     | 44.08    |
| 57.15    | 5.60     | 37.25    | 56.69    | 3.51     | 39.80    | 49.36    | 5.05     | 45.59    |
| 55.21    | 6.33     | 38.46    | 55.47    | 4.10     | 40.44    | 47.53    | 5.71     | 46.76    |
| 51.82    | 7.67     | 40.51    | 53.04    | 4.56     | 42.39    | 45.94    | 6.29     | 47.77    |
| 49.59    | 8.11     | 42.30    | 50.98    | 5.63     | 43.39    | 44.41    | 6.91     | 48.68    |
| 47.49    | 9.17     | 43.34    | 49.74    | 6.06     | 44.20    | 42.39    | 8.07     | 49.54    |
| 46.17    | 9.62     | 44.21    | 48.54    | 6.48     | 44.98    | 41.06    | 8.55     | 50.39    |
| 44.34    | 10.56    | 45.10    | 46.79    | 7.31     | 45.90    | 39.88    | 9.03     | 51.09    |
| 43.35    | 10.99    | 45.66    | 45.79    | 7.69     | 46.53    | 38.02    | 10.10    | 51.88    |
| 41.96    | 11.30    | 46.74    | 44.64    | 8.09     | 47.27    | 36.56    | 10.85    | 52.59    |
| 40.95    | 11.68    | 47.36    | 43.64    | 8.45     | 47.91    | 35.17    | 11.33    | 53.50    |
| 39.45    | 12.51    | 48.03    | 42.33    | 9.17     | 48.50    | 34.16    | 12.04    | 53.79    |
| 37.88    | 13.34    | 48.78    | 41.51    | 9.46     | 49.04    | 32.54    | 13.14    | 54.32    |
| 36.38    | 13.89    | 49.73    | 40.72    | 9.80     | 49.48    | 31.25    | 13.96    | 54.78    |
| 34.71    | 14.92    | 50.38    | 39.61    | 10.48    | 49.91    | 29.89    | 14.73    | 55.37    |
| 33.66    | 15.5322  | 50.81    | 38.80    | 10.75    | 50.45    | 28.41    | 15.83    | 55.76    |
| 30.92    | 17.22    | 51.86    | 37.76    | 11.35    | 50.89    | 27.37    | 16.65    | 55.98    |
| 28.86    | 18.34    | 52.80    | 36.17    | 12.14    | 51.70    | 25.77    | 18.05    | 56.18    |
| 26.489   | 20.63    | 52.88    | 34.88    | 13.00    | 52.13    | 23.62    | 20.21    | 56.18    |
| 25.01    | 21.55    | 53.44    | 33.98    | 13.54    | 52.48    | 18.75    | 25.34    | 55.90    |
| 21.35    | 25.22    | 53.43    | 32.45    | 14.48    | 53.07    |          |          |          |
| 16.42    | 30.98    | 52.60    | 31.34    | 15.01    | 53.65    |          |          |          |
|          |          |          | 29.94    | 15.82    | 54.25    |          |          |          |
|          |          |          | 28.07    | 17.00    | 54.93    |          |          |          |
|          |          |          | 24.82    | 19.92    | 55.27    |          |          |          |
|          |          |          | 22.48    | 22.51    | 55.01    |          |          |          |

**Table S3.** Experimental data for the binodal weight fraction percentage of the ABS formed by PPG 400 (1) + PEG (2) + water (3) at  $(298 \pm 1)$  K and atmospheric pressure.

| PEG 8000 |          |          | PEG 10000 |          |          | PEG 20000 |          |          |
|----------|----------|----------|-----------|----------|----------|-----------|----------|----------|
| $100w_1$ | $100w_2$ | $100w_3$ | $100w_1$  | $100w_2$ | $100w_3$ | $100w_1$  | $100w_2$ | $100w_3$ |
| 72.41    | 0.83     | 26.76    | 55.10     | 2.38     | 42.52    | 50.98     | 1.74     | 47.28    |
| 58.91    | 2.51     | 38.58    | 51.98     | 3.06     | 44.96    | 49.03     | 2.36     | 48.61    |
| 54.29    | 3.01     | 42.69    | 50.05     | 3.83     | 46.12    | 47.36     | 3.01     | 49.63    |
| 52.12    | 3.60     | 44.28    | 48.09     | 4.78     | 47.12    | 44.86     | 4.20     | 50.94    |
| 49.35    | 4.89     | 45.76    | 46.43     | 5.51     | 48.06    | 43.06     | 4.72     | 52.22    |
| 47.24    | 6.23     | 46.52    | 44.74     | 6.12     | 49.14    | 41.60     | 5.30     | 53.10    |
| 45.78    | 6.55     | 47.67    | 43.21     | 6.84     | 49.94    | 39.94     | 6.27     | 53.79    |
| 44.89    | 6.89     | 48.22    | 41.89     | 7.34     | 50.78    | 38.08     | 7.08     | 54.84    |
| 43.96    | 7.27     | 48.77    | 40.64     | 7.99     | 51.37    | 33.13     | 9.85     | 57.02    |
| 43.11    | 7.58     | 49.31    | 39.36     | 8.60     | 52.04    | 31.51     | 10.81    | 57.68    |
| 42.29    | 7.92     | 49.79    | 38.25     | 9.07     | 52.68    | 26.99     | 14.21    | 58.80    |
| 40.76    | 8.48     | 50.76    | 37.15     | 9.43     | 53.44    | 23.01     | 16.90    | 60.09    |
| 39.58    | 8.68     | 51.74    | 35.29     | 10.47    | 54.24    |           |          |          |
| 38.80    | 9.09     | 52.11    | 32.62     | 11.61    | 55.77    |           |          |          |
| 38.11    | 9.35     | 52.53    | 27.21     | 15.29    | 57.50    |           |          |          |
| 37.48    | 9.62     | 52.91    | 24.89     | 17.27    | 57.84    |           |          |          |
| 36.83    | 9.90     | 53.28    | 20.83     | 20.12    | 59.06    |           |          |          |
| 35.97    | 10.40    | 53.63    |           |          |          |           |          |          |
| 35.41    | 10.63    | 53.96    |           |          |          |           |          |          |
| 34.58    | 11.19    | 54.23    |           |          |          |           |          |          |
| 33.64    | 11.63    | 54.73    |           |          |          |           |          |          |
| 32.84    | 12.12    | 55.05    |           |          |          |           |          |          |
| 32.19    | 12.51    | 55.30    |           |          |          |           |          |          |
| 31.03    | 13.13    | 55.84    |           |          |          |           |          |          |
| 30.29    | 13.71    | 56.00    |           |          |          |           |          |          |
| 28.51    | 14.91    | 56.58    |           |          |          |           |          |          |
| 27.07    | 15.64    | 57.29    |           |          |          |           |          |          |
| 25.31    | 17.15    | 57.54    |           |          |          |           |          |          |
| 23.24    | 19.16    | 57.60    |           |          |          |           |          |          |
| 21.10    | 21.65    | 57.25    |           |          |          |           |          |          |

The binodal curves were determined by the weight quantification of all components added ( $u(m) = 10^{-4}$  g), in which the weight mass fractions corresponding to the cloud and limpid points were used to describe each binodal curve. The experimental solubility curves were correlated using equation 1:

$$[PPG] = A \exp[(B[PEG]^{0.5}) - (CPEG^3)] \quad (1)$$

where PPG and PEG represent the PPG 400 and each PEG weight fraction percentages, respectively, and A, B, and C are constants obtained by regression. Equation 1 is a mathematical description based on a mass balance approach widely used to correlate the experimental binodal/solubility curves of ABS, originally proposed by Merchuk et al.<sup>1</sup> According to Freire et al.,<sup>2</sup> and although other equations have been proposed to correlate solubility curves of ternary systems, equation 1 is amongst the ones that better fit to the experimental data of ABS, and as such has been applied in the current work.

**Table S4.** Adjusted parameters and respective standard deviations ( $\sigma$ ) obtained by the fitting of the experimental data of ABS composed by PPG 400 (1) + PEG (2) + water (3) at  $(298 \pm 1)$  K and atmospheric pressure, by equation 1.

| PEG          | $A \pm \sigma$     | $B \pm \sigma$        | $10^5 (C \pm \sigma)$ |
|--------------|--------------------|-----------------------|-----------------------|
| <b>600</b>   | $164.59 \pm 10.60$ | $-0.31087 \pm 0.0205$ | $1.2917 \pm 0.3046$   |
| <b>1000</b>  | $186.65 \pm 18.32$ | $-0.37780 \pm 0.0333$ | $1.5678 \pm 0.7469$   |
| <b>2000</b>  | $101.37 \pm 4.12$  | $-0.25705 \pm 0.0159$ | $1.9863 \pm 0.4823$   |
| <b>4000</b>  | $97.30 \pm 4.29$   | $-0.27732 \pm 0.0169$ | $1.2500 \pm 0.0726$   |
| <b>6000</b>  | $88.79 \pm 3.71$   | $-0.26639 \pm 0.0186$ | $1.5268 \pm 0.8773$   |
| <b>8000</b>  | $94.46 \pm 3.01$   | $-0.29438 \pm 0.0126$ | $1.0922 \pm 0.4046$   |
| <b>10000</b> | $79.32 \pm 3.21$   | $-0.23231 \pm 0.0176$ | $3.9440 \pm 0.9196$   |
| <b>20000</b> | $67.97 \pm 2.31$   | $-0.21017 \pm 0.0175$ | $4.7372 \pm 1.2990$   |

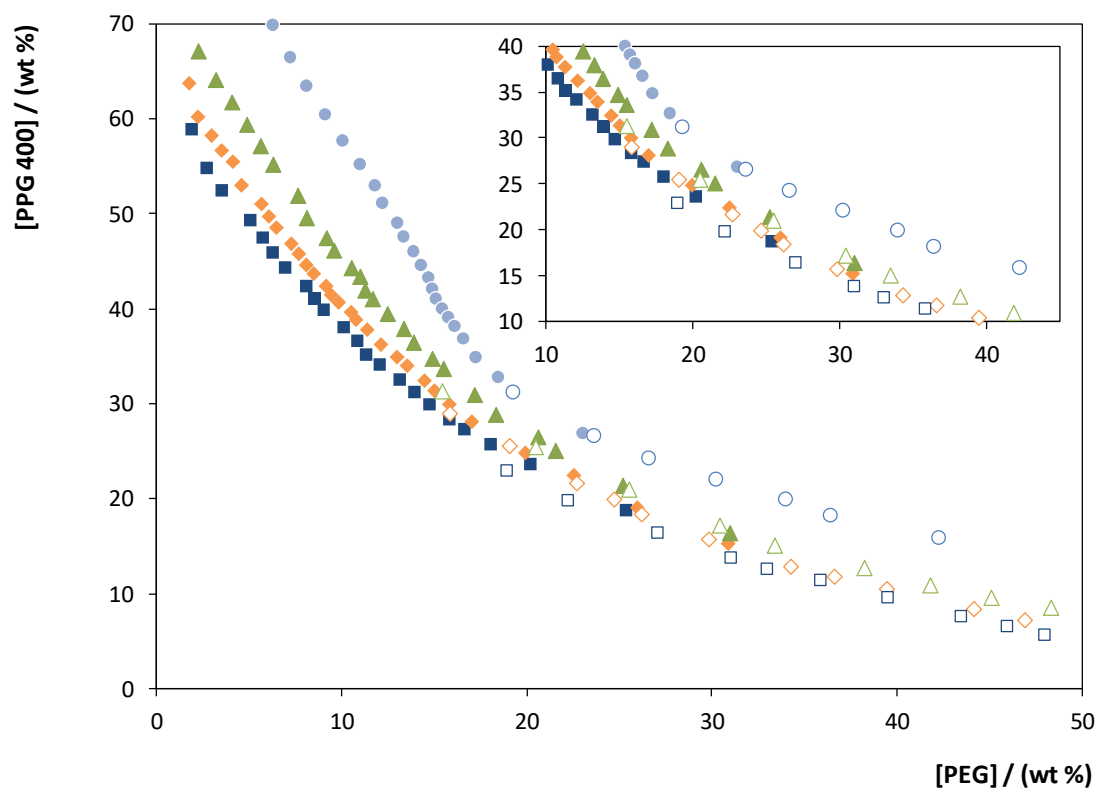

**Figure S1.** Phase diagrams for the systems composed of PPG 400 + PEG + H<sub>2</sub>O at 298 K determined in this work: PEG 600 (●); PEG 2000 (▲); PEG 4000 (◆); PEG 6000 (■); and reported in the literature<sup>3</sup>: PEG 600 (○); PEG 2000 (△); PEG 4000 (◇); PEG 6000 (□);

**Table S5.** Standard deviation between the experimental solubility data obtained in this work to those reported in the literature<sup>3</sup> corresponding to the weight fraction percentage of PPG in each ABS he ABS formed by PPG 400 + PEG + water at 298 K reported in literature. The experimental data of this work was determined by the fitting by equation (1) to the same weight fraction percentages of PEG reported in the literature.

| PEG 600 /wt%                       |                  |                                    |          | PEG 2000 /wt%                      |                  |                                    |          |
|------------------------------------|------------------|------------------------------------|----------|------------------------------------|------------------|------------------------------------|----------|
| PEG <sup>3</sup>                   | PPG <sup>3</sup> | PPG (this work)                    | $\sigma$ | PEG <sup>3</sup>                   | PPG <sup>3</sup> | PPG (this work)                    | $\sigma$ |
| 19.29                              | 31.12            | 38.30                              | 5.08     | 15.47                              | 31.26            | 34.27                              | 2.13     |
| 23.64                              | 26.62            | 30.61                              | 2.83     | 20.50                              | 25.41            | 26.68                              | 0.90     |
| 26.61                              | 24.21            | 25.96                              | 1.24     | 25.51                              | 20.98            | 19.90                              | 0.76     |
| 30.22                              | 22.01            | 20.86                              | 0.81     | 30.41                              | 17.16            | 14.05                              | 2.20     |
| 34.01                              | 19.91            | 16.16                              | 2.65     | 33.43                              | 15.06            | 10.92                              | 2.93     |
| 36.40                              | 18.19            | 13.53                              | 3.29     | 38.23                              | 12.71            | 6.82                               | 4.17     |
| 42.25                              | 15.85            | 8.24                               | 5.38     | 41.82                              | 10.93            | 4.50                               | 4.55     |
|                                    |                  |                                    |          | 45.13                              | 9.61             | 2.90                               | 4.74     |
|                                    |                  |                                    |          | 48.36                              | 8.46             | 1.79                               | 4.71     |
|                                    |                  |                                    |          | 50.36                              | 7.30             | 1.29                               | 4.25     |
| <b>Average <math>\sigma</math></b> |                  | <b>Maximum <math>\sigma</math></b> |          | <b>Average <math>\sigma</math></b> |                  | <b>Maximum <math>\sigma</math></b> |          |
| 3.04                               |                  | 5.38                               |          | 3.13                               |                  | 4.74                               |          |
| PEG 4000                           |                  |                                    |          | PEG 6000                           |                  |                                    |          |
| PEG <sup>3</sup>                   | PPG <sup>3</sup> | PPG (this work)                    | $\sigma$ | PEG <sup>3</sup>                   | PPG <sup>3</sup> | PPG (this work)                    | $\sigma$ |
| 15.86                              | 28.92            | 30.68                              | 1.24     | 18.96                              | 22.88            | 25.08                              | 1.56     |
| 19.11                              | 25.50            | 26.63                              | 0.83     | 22.22                              | 19.73            | 21.39                              | 1.18     |
| 22.68                              | 21.63            | 22.45                              | 0.58     | 27.06                              | 16.35            | 16.41                              | 0.04     |
| 24.70                              | 19.87            | 20.31                              | 0.31     | 31.04                              | 13.80            | 12.75                              | 0.74     |
| 26.19                              | 18.40            | 18.80                              | 0.29     | 33.02                              | 12.63            | 11.09                              | 1.09     |
| 29.81                              | 15.66            | 15.37                              | 0.20     | 35.86                              | 11.39            | 8.91                               | 1.75     |
| 34.30                              | 12.81            | 11.57                              | 0.87     | 39.50                              | 9.53             | 6.50                               | 2.15     |
| 36.61                              | 11.84            | 9.84                               | 1.41     | 43.46                              | 7.58             | 4.38                               | 2.26     |
| 39.46                              | 10.43            | 7.90                               | 1.78     | 45.99                              | 6.59             | 3.30                               | 2.32     |
| 44.17                              | 8.40             | 5.24                               | 2.23     | 47.98                              | 5.60             | 2.60                               | 2.12     |
| 46.90                              | 7.24             | 4.01                               | 2.28     |                                    |                  |                                    |          |
| 50.23                              | 5.53             | 2.80                               | 1.93     |                                    |                  |                                    |          |
| <b>Average <math>\sigma</math></b> |                  | <b>Maximum <math>\sigma</math></b> |          | <b>Average <math>\sigma</math></b> |                  | <b>Maximum <math>\sigma</math></b> |          |
| 0.96                               |                  | 2.28                               |          | 1.52                               |                  | 2.32                               |          |

**Table S6.** Experimental data for the binodal weight fraction percentage of the ABS formed by PPG 400 (1) + PEG 600 (2) + water (3) at different temperatures and atmospheric pressure.

| 288 K             |                   |                   | 298 K             |                   |                   | 308 K             |                   |                   | 313 K             |                   |                   |
|-------------------|-------------------|-------------------|-------------------|-------------------|-------------------|-------------------|-------------------|-------------------|-------------------|-------------------|-------------------|
| 100w <sub>1</sub> | 100w <sub>2</sub> | 100w <sub>3</sub> | 100w <sub>1</sub> | 100w <sub>2</sub> | 100w <sub>3</sub> | 100w <sub>1</sub> | 100w <sub>2</sub> | 100w <sub>3</sub> | 100w <sub>1</sub> | 100w <sub>2</sub> | 100w <sub>3</sub> |
| 75.61             | 6.36              | 18.03             | 76.48             | 6.49              | 17.03             | 74.34             | 3.85              | 21.81             | 54.96             | 5.05              | 39.99             |
| 71.00             | 7.67              | 21.33             | 71.74             | 7.39              | 20.87             | 66.41             | 4.49              | 29.10             | 47.75             | 6.01              | 46.24             |
| 68.83             | 8.71              | 22.47             | 65.93             | 9.27              | 24.80             | 62.98             | 5.34              | 31.68             | 42.69             | 6.74              | 50.57             |
| 64.34             | 10.93             | 24.73             | 61.76             | 9.92              | 28.32             | 59.99             | 6.20              | 33.81             | 33.30             | 9.09              | 57.61             |
| 61.46             | 11.79             | 26.75             | 59.30             | 10.76             | 29.95             | 57.14             | 6.97              | 35.89             | 27.53             | 12.05             | 60.43             |
| 57.58             | 13.63             | 28.78             | 57.14             | 11.58             | 31.28             | 51.94             | 8.29              | 39.77             | 23.35             | 15.55             | 61.09             |
| 54.71             | 15.00             | 30.28             | 54.13             | 13.23             | 32.64             | 49.78             | 9.03              | 41.18             | 22.05             | 19.35             | 58.60             |
| 51.74             | 16.20             | 32.07             | 52.00             | 13.77             | 34.23             | 42.22             | 10.88             | 46.89             | 19.90             | 22.33             | 57.77             |
| 49.85             | 16.81             | 33.34             | 50.39             | 14.35             | 35.25             | 40.27             | 11.97             | 47.76             | 17.72             | 24.66             | 57.62             |
| 47.53             | 17.86             | 34.61             | 48.83             | 14.86             | 36.31             | 37.80             | 12.61             | 49.59             | 15.65             | 28.40             | 55.95             |
| 42.89             | 19.70             | 37.41             | 47.37             | 15.43             | 37.20             | 31.78             | 15.39             | 52.82             |                   |                   |                   |
| 39.41             | 20.74             | 39.85             | 45.23             | 16.60             | 38.17             | 27.65             | 16.90             | 55.44             |                   |                   |                   |
| 38.10             | 21.41             | 40.49             | 41.50             | 17.79             | 40.70             | 23.54             | 19.83             | 56.62             |                   |                   |                   |
| 35.02             | 23.19             | 41.79             | 39.78             | 18.87             | 40.70             | 21.57             | 22.46             | 55.97             |                   |                   |                   |
| 29.93             | 27.21             | 42.87             | 38.67             | 19.29             | 41.36             | 18.82             | 24.98             | 56.20             |                   |                   |                   |
|                   |                   |                   | 37.35             | 19.93             | 42.04             | 17.76             | 28.28             | 53.97             |                   |                   |                   |
|                   |                   |                   | 36.36             | 20.26             | 42.72             | 15.82             | 31.978            | 52.20             |                   |                   |                   |
|                   |                   |                   | 34.97             | 20.99             | 43.39             |                   |                   |                   |                   |                   |                   |
|                   |                   |                   | 33.88             | 21.66             | 44.03             |                   |                   |                   |                   |                   |                   |
|                   |                   |                   | 32.43             | 22.59             | 44.47             |                   |                   |                   |                   |                   |                   |



**Table S7.** Experimental data for the binodal weight fraction percentage of the ABS formed by PPG 400 (1) + PEG 20000 (2) + water (3) at different temperatures and atmospheric pressure.

| 288 K    |          |          | 298 K    |          |          | 308 K    |          |          | 313 K    |          |          |
|----------|----------|----------|----------|----------|----------|----------|----------|----------|----------|----------|----------|
| $100w_1$ | $100w_2$ | $100w_3$ |
| 75.61    | 6.36     | 18.03    | 50.98    | 1.74     | 47.28    | 48.89    | 1.83     | 49.28    | 46.98    | 1.47     | 51.54    |
| 71.00    | 7.67     | 21.33    | 49.03    | 2.36     | 48.61    | 47.33    | 2.32     | 50.35    | 39.57    | 3.02     | 57.41    |
| 68.83    | 8.71     | 22.47    | 47.36    | 3.01     | 49.63    | 45.75    | 2.81     | 51.44    | 35.58    | 3.83     | 60.59    |
| 64.34    | 10.93    | 24.73    | 44.86    | 4.201    | 50.94    | 44.51    | 3.20     | 52.29    | 33.64    | 4.91     | 61.45    |
| 61.46    | 11.79    | 26.75    | 43.06    | 4.72     | 52.22    | 42.63    | 3.55     | 53.83    | 31.80    | 5.77     | 62.42    |
| 57.58    | 13.63    | 28.78    | 41.60    | 5.30     | 53.10    | 40.42    | 4.57     | 55.01    | 29.39    | 6.89     | 63.72    |
| 54.71    | 15.00    | 30.28    | 39.94    | 6.27     | 53.79    | 35.95    | 5.66     | 58.39    | 21.20    | 10.66    | 68.14    |
| 51.74    | 16.20    | 32.07    | 38.08    | 7.08     | 54.84    | 34.53    | 6.55     | 58.92    | 19.18    | 12.95    | 67.87    |
| 49.85    | 16.81    | 33.34    | 33.13    | 9.85     | 57.02    | 32.65    | 6.88     | 60.47    | 14.69    | 17.23    | 68.08    |
| 47.53    | 17.86    | 34.61    | 31.51    | 10.81    | 57.68    | 30.54    | 8.17     | 61.29    | 11.79    | 20.77    | 67.43    |
| 42.89    | 19.70    | 37.41    | 26.99    | 14.21    | 58.80    | 28.84    | 8.73     | 62.43    | 9.73     | 25.02    | 65.25    |
| 39.41    | 20.74    | 39.85    | 23.01    | 16.90    | 60.09    | 26.68    | 9.73     | 63.59    |          |          |          |
| 38.10    | 21.41    | 40.49    |          |          |          | 25.16    | 10.51    | 64.32    |          |          |          |
|          |          |          |          |          |          | 21.18    | 14.95    | 63.87    |          |          |          |
|          |          |          |          |          |          | 19.31    | 17.22    | 63.47    |          |          |          |
|          |          |          |          |          |          | 17.27    | 20.55    | 62.18    |          |          |          |
|          |          |          |          |          |          | 14.43    | 24.07    | 61.50    |          |          |          |

**Table S8.** Adjusted parameters and respective standard deviations ( $\sigma$ ) obtained by the fitting of the experimental data of ABS composed by PPG 400 (1) + PEG 600 (2) + water (3) at different temperatures and atmospheric pressure, by equation 1.

| Temperature (K) | $A \pm \sigma$     | $B \pm \sigma$        | $10^5 (C \pm \sigma)$ |
|-----------------|--------------------|-----------------------|-----------------------|
| <b>288</b>      | $125.81 \pm 13.93$ | $-0.19839 \pm 0.0369$ | $2.4000 \pm 0.6933$   |
| <b>298</b>      | $164.59 \pm 10.60$ | $-0.31087 \pm 0.0205$ | $1.2917 \pm 0.3046$   |
| <b>308</b>      | $167.65 \pm 15.66$ | $-0.41731 \pm 0.0362$ | $0.3221 \pm 0.0786$   |
| <b>313</b>      | $179.18 \pm 50.71$ | $-0.54274 \pm 0.1082$ | $2.4419 \pm 1.9113$   |

**Table S9.** Adjusted parameters and respective standard deviations ( $\sigma$ ) obtained by the fitting of the experimental data of ABS composed by PPG 400 (1) + PEG 20000 (2) + water (3) at different temperatures and atmospheric pressure, by equation 1.

| Temperature (K) | $A \pm \sigma$   | $B \pm \sigma$        | $10^5 (C \pm \sigma)$ |
|-----------------|------------------|-----------------------|-----------------------|
| <b>288</b>      | $71.05 \pm 2.22$ | $-0.17694 \pm 0.0146$ | $2.3483 \pm 0.5609$   |
| <b>298</b>      | $67.97 \pm 2.31$ | $-0.21017 \pm 0.0175$ | $4.7372 \pm 1.299$    |
| <b>308</b>      | $79.88 \pm 4.39$ | $-0.33809 \pm 0.0263$ | $0.3547 \pm 0.3869$   |
| <b>313</b>      | $73.01 \pm 4.80$ | $-0.35600 \pm 0.0324$ | $1.9387 \pm 1.3476$   |

**Table S10.** Extraction efficiencies ( $EE\%$ ) of Diazinon in each 35 wt% PPG 400 + 15 wt% PEG + 50 wt% H<sub>2</sub>O ABS at  $(313 \pm 1)$  K.

| PEG / (g.mol <sup>-1</sup> ) | $EE\%_{\text{Diazinon}} \pm \sigma$ |
|------------------------------|-------------------------------------|
| <b>600</b>                   | $54.49 \pm 0.67$                    |
| <b>1000</b>                  | $73.82 \pm 1.51$                    |
| <b>2000</b>                  | $86.56 \pm 0.81$                    |
| <b>4000</b>                  | $89.70 \pm 0.20$                    |
| <b>6000</b>                  | $90.74 \pm 0.03$                    |
| <b>8000</b>                  | $91.01 \pm 0.01$                    |
| <b>10000</b>                 | $92.78 \pm 0.59$                    |
| <b>20000</b>                 | $93.71 \pm 0.19$                    |

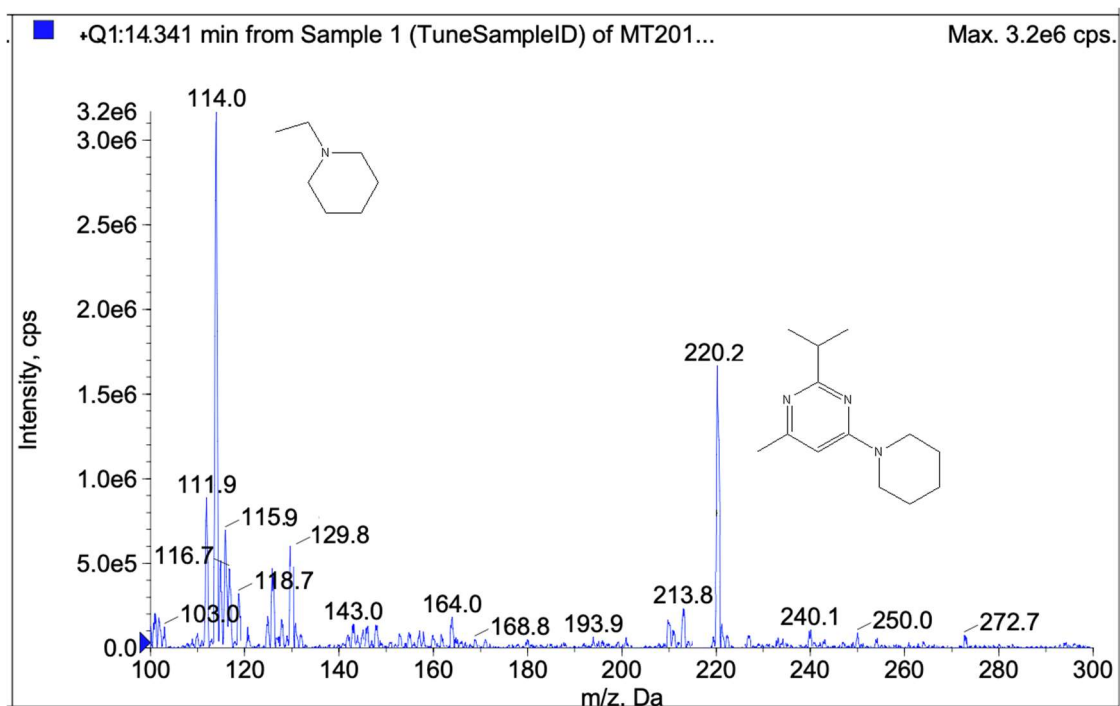

**Figure S2.** ESI-MS/MS(+) of the products **3** and **5** of  $m/z=113.12$  and  $219.17$ , from the nucleophilic degradation of diazinon in the ABS system.

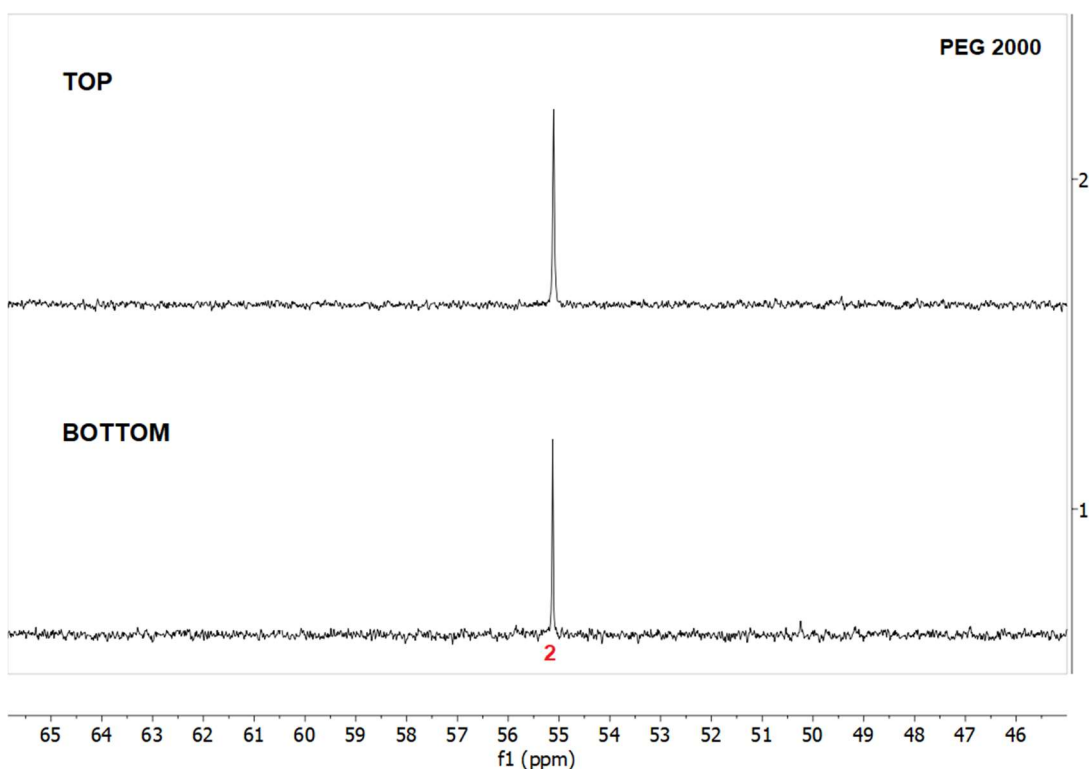

**Figure S3.**  $^{31}\text{P}$ -NMR spectra of both phases of the ABS composed of 35 wt% PPG 400 + 15 wt% PEG 2000 + 50 wt% H<sub>2</sub>O used as a reaction medium of nucleophilic degradation of Diazinon with piperidine.

## Kinetics details

The rate law for all the reactions studied is given by eqn (2), where P and S represent one of the products and diazinon. The rate constants ( $k_{obsd}$ ) were obtained in the presence of total piperidine excess (at least 10 folder) and are shown in Table S11.

$$\frac{d[P]}{dt} = k_{obsd} [S] \quad (2)$$

From rate constants values ( $k_{obsd}$ ), the half-lives ( $t_{1/2}$ ) of degradation of diazinon were obtained in the different ABS by using eqn (3):

$$t_{1/2} = \frac{\ln 2}{k_{obs}} \quad (3)$$

**Table S11.** Pseudo-first-order rate constants ( $k_{obs}$ ) and second-order rate constant ( $K_2$ ) for the degradation of diazinon in the ABS.

|                  | $10^4 k_{OBS} / \text{min}^{-1}$ | $10^3 K_2 / \text{M}^{-1}\text{min}^{-1}$ |
|------------------|----------------------------------|-------------------------------------------|
| <b>PPG 600</b>   | $7.52 \pm 0.13$                  | $1.87 \pm 0.03$                           |
| <b>PPG 2000</b>  | $5.40 \pm 0.41$                  | $1.37 \pm 0.04$                           |
| <b>PPG 20000</b> | $3.72 \pm 0.02$                  | $0.94 \pm 0.05$                           |

Second order rate constant ( $K_2$ ) were calculated by eq 4, were  $k_0$  is the rate constant for solvolysis and [pip] is the concentration of piperidine.

$$k_{obs} = k_0 + K_2[\text{pip}] \quad (4)$$

## References

- 1 J. C. Merchuk, B. A. Andrews and J. A. Asenjo, Aqueous two-phase systems for protein separation: Studies on phase inversion, *J. Chromatogr. B Biomed. Sci. Appl.*, 1998, **711**, 285–293.
- 2 M. G. Freire, A. F. M. Cláudio, J. M. M. Araújo, J. a. P. Coutinho, I. M. Marrucho, J. N. C. Lopes and L. P. N. Rebelo, Aqueous biphasic systems: a boost brought about by using ionic liquids, *Chem. Soc. Rev.*, 2012, **41**, 4966.
- 3 R. Sadeghi and M. Maali, Toward an understanding of aqueous biphasic formation in polymer–polymer aqueous systems, *Polymer (Guildf.)*, 2016, **83**, 1–11.
